# Supplementary material for: Chemistry and biological activities of hetisine-type diterpenoid alkaloids
Source: Royal Society of Chemistry journal article supplement (doi:10.1039/d1ra07173d), 2021-01-01
Supplement: d1ra07173d1.pdf [file d1ra07173d1.pdf]

Electronic Supplementary Information

Chemistry and biological activities of hetisine-type diterpenoid alkaloids

Tianpeng Yin, Huixia Zhang, Wei Zhang \*, and Zhihong Jiang \*

**Table 1S.** The name, plant source, and reference of hetisine-type DAs.

| No | Name                                          | Plants                                                                                                                                                                                                                                                                                                                                                                                                                                                                                                                                                                                                                                                                                                                                                                                                                                                                                                                                                                                                                                                                                                                                                                                                     |
|----|-----------------------------------------------|------------------------------------------------------------------------------------------------------------------------------------------------------------------------------------------------------------------------------------------------------------------------------------------------------------------------------------------------------------------------------------------------------------------------------------------------------------------------------------------------------------------------------------------------------------------------------------------------------------------------------------------------------------------------------------------------------------------------------------------------------------------------------------------------------------------------------------------------------------------------------------------------------------------------------------------------------------------------------------------------------------------------------------------------------------------------------------------------------------------------------------------------------------------------------------------------------------|
| 1  | Spirasine XI                                  | <i>S. japonica</i> var. <i>fortunei</i> <sup>1</sup>                                                                                                                                                                                                                                                                                                                                                                                                                                                                                                                                                                                                                                                                                                                                                                                                                                                                                                                                                                                                                                                                                                                                                       |
| 2  | Spirasine IV                                  | <i>S. japonica</i> var. <i>fortunei</i> <sup>1</sup>                                                                                                                                                                                                                                                                                                                                                                                                                                                                                                                                                                                                                                                                                                                                                                                                                                                                                                                                                                                                                                                                                                                                                       |
| 3  | Spirasine IX                                  | <i>S. japonica</i> var. <i>fortunei</i> <sup>1</sup>                                                                                                                                                                                                                                                                                                                                                                                                                                                                                                                                                                                                                                                                                                                                                                                                                                                                                                                                                                                                                                                                                                                                                       |
| 4  | Nominine<br>(11-deoxykobusine)                | <i>A. finetianum</i> <sup>2</sup> , <i>A. ibukiense</i> <sup>3</sup> , <i>A. sanyoense</i> <sup>4</sup> , <i>A. zeravschanicum</i> <sup>5</sup><br><i>D. tongolese</i> <sup>6</sup>                                                                                                                                                                                                                                                                                                                                                                                                                                                                                                                                                                                                                                                                                                                                                                                                                                                                                                                                                                                                                        |
| 5  | Cossonidine (davisine)                        | <i>D. cadiopetalum</i> <sup>7</sup> , <i>D. cossonianum</i> <sup>7</sup> , <i>D. davisii</i> <sup>8</sup>                                                                                                                                                                                                                                                                                                                                                                                                                                                                                                                                                                                                                                                                                                                                                                                                                                                                                                                                                                                                                                                                                                  |
| 6  | Spirasine X                                   | <i>S. japonica</i> <sup>9</sup>                                                                                                                                                                                                                                                                                                                                                                                                                                                                                                                                                                                                                                                                                                                                                                                                                                                                                                                                                                                                                                                                                                                                                                            |
| 7  | Vilmorrianine E                               | <i>A. vilmorrianum</i> <sup>10</sup>                                                                                                                                                                                                                                                                                                                                                                                                                                                                                                                                                                                                                                                                                                                                                                                                                                                                                                                                                                                                                                                                                                                                                                       |
| 8  | Sanyonamine<br>(2 $\alpha$ -hydroxynominine)  | <i>A. sanyoense</i> <sup>11</sup> , <i>A. sanyoense</i> var. <i>tonense</i> <sup>12</sup><br><i>D. cadiopetalum</i> <sup>7</sup> , <i>D. cossonianum</i>                                                                                                                                                                                                                                                                                                                                                                                                                                                                                                                                                                                                                                                                                                                                                                                                                                                                                                                                                                                                                                                   |
| 9  | Kobusine                                      | <i>A. lucidusculum</i> <sup>7</sup> , <i>A. japonicum</i> subsp. <i>subcuneatum</i> <sup>13</sup> ,<br><i>A. orientale</i> <sup>14</sup> , <i>A. sachalinense</i> <sup>15, 16</sup> , <i>A. yesoense</i> var. <i>macroyesoense</i> <sup>17</sup><br><i>D. davisii</i> <sup>8</sup>                                                                                                                                                                                                                                                                                                                                                                                                                                                                                                                                                                                                                                                                                                                                                                                                                                                                                                                         |
| 10 | Tatsienenseine C                              | <i>D. tatsienense</i> <sup>18</sup>                                                                                                                                                                                                                                                                                                                                                                                                                                                                                                                                                                                                                                                                                                                                                                                                                                                                                                                                                                                                                                                                                                                                                                        |
| 11 | 1 $\alpha$ ,11,13 $\beta$ -trihydroxyhetisine | <i>A. heterophyllum</i> <sup>19</sup>                                                                                                                                                                                                                                                                                                                                                                                                                                                                                                                                                                                                                                                                                                                                                                                                                                                                                                                                                                                                                                                                                                                                                                      |
| 12 | 7 $\alpha$ -hydroxycossonidine                | <i>C. oliveriana</i> <sup>20</sup>                                                                                                                                                                                                                                                                                                                                                                                                                                                                                                                                                                                                                                                                                                                                                                                                                                                                                                                                                                                                                                                                                                                                                                         |
| 13 | Hetisine                                      | <i>A. anthora</i> <sup>21</sup> , <i>A. coreanum</i> <sup>22</sup> , <i>A. heterophyllum</i> <sup>23</sup> ,<br><i>A. kusnezoffii</i> <sup>24</sup> , <i>A. palmatum</i> <sup>25</sup> , <i>A. rotundifolium</i> <sup>26</sup> ,<br><i>A. zeravschanicum</i> <sup>27</sup><br><i>C. anthoroidea</i> <sup>28</sup> , <i>C. axilliflora</i> <sup>29</sup> , <i>C. olopetala</i> <sup>30</sup> ,<br><i>C. stenocarpa</i> <sup>31</sup><br><i>D. buschianum</i> <sup>32</sup> , <i>D. cardinale</i> <sup>33</sup> , <i>D. crispulum</i> <sup>34</sup> ,<br><i>D. davisii</i> <sup>35</sup> , <i>D. delavayi</i> var. <i>pogonanthum</i> <sup>36</sup> , <i>D. elatum</i> <sup>37, 38</sup> ,<br><i>D. fissum</i> subsp. <i>anatolicum</i> <sup>39</sup> , <i>D. nudicaule</i> <sup>40</sup> ,<br><i>D. nuttallianum</i> <sup>41</sup> , <i>D. occidentale</i> <sup>42</sup> , <i>D. omeiense</i> <sup>43</sup> ,<br><i>D. peregrinum</i> <sup>44</sup> , <i>D. peregrinum</i> var. <i>elongatum</i> <sup>45</sup> ,<br><i>D. tatsienense</i> <sup>46</sup> , <i>D. tongolese</i> <sup>47</sup> , <i>D. trichophorum</i> <sup>8</sup> ,<br><i>D. venulosum</i> <sup>48</sup> , <i>D. virgatum</i> <sup>49</sup> |
| 14 | 13-O-acetylhetisine                           | <i>A. naviculare</i> <sup>50</sup> , <i>A. palmatum</i> <sup>51</sup><br><i>C. anthoroidea</i> <sup>28</sup><br><i>D. anthriscifolium</i> var. <i>majus</i> <sup>52</sup> , <i>D. macrocentrum</i> <sup>53</sup> ,<br><i>D. nuttallianum</i> <sup>54</sup>                                                                                                                                                                                                                                                                                                                                                                                                                                                                                                                                                                                                                                                                                                                                                                                                                                                                                                                                                 |

---

|    |                                       |                                                                                                                                                                                                                                                                                                                                                                                                                                                                                                                                                                                                                                                                                                                                                                                                                           |
|----|---------------------------------------|---------------------------------------------------------------------------------------------------------------------------------------------------------------------------------------------------------------------------------------------------------------------------------------------------------------------------------------------------------------------------------------------------------------------------------------------------------------------------------------------------------------------------------------------------------------------------------------------------------------------------------------------------------------------------------------------------------------------------------------------------------------------------------------------------------------------------|
| 15 | 2,11,13-Triacetylhetisine             | <i>A. coreanum</i> <sup>55</sup>                                                                                                                                                                                                                                                                                                                                                                                                                                                                                                                                                                                                                                                                                                                                                                                          |
| 16 | Hetisinone                            | <i>A. anthora</i> <sup>56</sup> , <i>A. coreanum</i> <sup>57,58</sup> , <i>A. heterophyllum</i> <sup>19</sup> ,<br><i>A. moldavicum</i> <sup>59</sup> , <i>A. naviculare</i> <sup>51</sup> , <i>A. rotundifolium</i> <sup>26</sup> ,<br><i>A. tanguticum</i> <sup>60</sup><br><i>C. regalis</i> <sup>61</sup> , <i>C. stenocarpa</i> <sup>31</sup> ,<br><i>D. cardinale</i> <sup>62</sup> , <i>D. davisii</i> <sup>63</sup> , <i>D. fissum</i> subsp. <i>anatolicum</i> <sup>64</sup> ,<br><i>D. gracile</i> <sup>65</sup> , <i>D. nudicaule</i> <sup>42</sup> , <i>D. occidentale</i> <sup>47</sup> ,<br><i>D. peregrinum</i> var. <i>elongatum</i> <sup>32</sup> , <i>D. tatsienense</i> <sup>40</sup> ,<br><i>D. trichophorum</i> <sup>66</sup> , <i>D. venulosum</i> <sup>67</sup> , <i>D. virgatum</i> <sup>34</sup> |
| 17 | Venuluson                             | <i>D. venulosum</i> <sup>68</sup>                                                                                                                                                                                                                                                                                                                                                                                                                                                                                                                                                                                                                                                                                                                                                                                         |
| 18 | Fissumine                             | <i>D. fissum</i> subsp. <i>anatolicum</i> <sup>64</sup>                                                                                                                                                                                                                                                                                                                                                                                                                                                                                                                                                                                                                                                                                                                                                                   |
| 19 | Guan-fu base V                        | <i>A. coreanum</i> <sup>69</sup>                                                                                                                                                                                                                                                                                                                                                                                                                                                                                                                                                                                                                                                                                                                                                                                          |
| 20 | Palmasine                             | <i>A. palmatum</i> <sup>50</sup>                                                                                                                                                                                                                                                                                                                                                                                                                                                                                                                                                                                                                                                                                                                                                                                          |
| 21 | Palmadine                             | <i>A. palmatum</i> <sup>50</sup>                                                                                                                                                                                                                                                                                                                                                                                                                                                                                                                                                                                                                                                                                                                                                                                          |
| 22 | Hanamisine                            | <i>A. sanyoense</i> <sup>70</sup>                                                                                                                                                                                                                                                                                                                                                                                                                                                                                                                                                                                                                                                                                                                                                                                         |
| 23 | Isohypognavine                        | <i>A. crassicaule</i> <sup>71</sup> , <i>A. japonicum</i> <sup>72</sup>                                                                                                                                                                                                                                                                                                                                                                                                                                                                                                                                                                                                                                                                                                                                                   |
| 24 | Souline F                             | <i>D. souliei</i> <sup>73</sup>                                                                                                                                                                                                                                                                                                                                                                                                                                                                                                                                                                                                                                                                                                                                                                                           |
| 25 | Crassicauline B                       | <i>A. crassicaule</i> <sup>71</sup>                                                                                                                                                                                                                                                                                                                                                                                                                                                                                                                                                                                                                                                                                                                                                                                       |
| 26 | Ryosenaminol<br>(1-Deoxyhypognavinol) | <i>A. ibukiense</i> <sup>74</sup>                                                                                                                                                                                                                                                                                                                                                                                                                                                                                                                                                                                                                                                                                                                                                                                         |
| 27 | Ryosenamine                           | <i>A. ibukiense</i> <sup>74</sup> , <i>A. japonicum</i> subsp. <i>subcuneatum</i> <sup>75</sup>                                                                                                                                                                                                                                                                                                                                                                                                                                                                                                                                                                                                                                                                                                                           |
| 28 | Delfissinol                           | <i>A. naviculare</i> <sup>76</sup> , <i>A. taipaicum</i> <sup>77</sup><br><i>D. fissum</i> subsp. <i>anatolicum</i> <sup>64</sup>                                                                                                                                                                                                                                                                                                                                                                                                                                                                                                                                                                                                                                                                                         |
| 29 | Delnuttine                            | <i>D. nuttallianum</i> <sup>78</sup>                                                                                                                                                                                                                                                                                                                                                                                                                                                                                                                                                                                                                                                                                                                                                                                      |
| 30 | Deacetylhanamisine (hanamiyama base)  | <i>A. sanyoense</i> <sup>70</sup> , <i>A. sanyoense</i> var. <i>tonense</i> <sup>12</sup>                                                                                                                                                                                                                                                                                                                                                                                                                                                                                                                                                                                                                                                                                                                                 |
| 31 | Venudelphine                          | <i>D. venulosum</i> <sup>67</sup>                                                                                                                                                                                                                                                                                                                                                                                                                                                                                                                                                                                                                                                                                                                                                                                         |
| 32 | Trichodelphinine A                    | <i>D. trichophorum</i> <sup>44</sup>                                                                                                                                                                                                                                                                                                                                                                                                                                                                                                                                                                                                                                                                                                                                                                                      |
| 33 | Trichodelphinine B                    | <i>D. trichophorum</i> <sup>44</sup>                                                                                                                                                                                                                                                                                                                                                                                                                                                                                                                                                                                                                                                                                                                                                                                      |
| 34 | Trichodelphinine C                    | <i>D. trichophorum</i> <sup>44</sup>                                                                                                                                                                                                                                                                                                                                                                                                                                                                                                                                                                                                                                                                                                                                                                                      |
| 35 | Trichodelphinine D                    | <i>A. coreanum</i> <sup>55</sup><br><i>D. trichophorum</i> <sup>44</sup>                                                                                                                                                                                                                                                                                                                                                                                                                                                                                                                                                                                                                                                                                                                                                  |
| 36 | Tiantaishandine                       | <i>D. tiantaishanense</i> <sup>79</sup>                                                                                                                                                                                                                                                                                                                                                                                                                                                                                                                                                                                                                                                                                                                                                                                   |
| 37 | Majusidine B                          | <i>D. majus</i> <sup>80</sup>                                                                                                                                                                                                                                                                                                                                                                                                                                                                                                                                                                                                                                                                                                                                                                                             |
| 38 | Trichodelphinine E                    | <i>D. trichophorum</i> <sup>44</sup>                                                                                                                                                                                                                                                                                                                                                                                                                                                                                                                                                                                                                                                                                                                                                                                      |
| 39 | Guan-fu base R                        | <i>A. coreanum</i> <sup>81</sup>                                                                                                                                                                                                                                                                                                                                                                                                                                                                                                                                                                                                                                                                                                                                                                                          |
| 40 | Guan-fu base A1                       | <i>A. coreanum</i> <sup>82</sup>                                                                                                                                                                                                                                                                                                                                                                                                                                                                                                                                                                                                                                                                                                                                                                                          |
| 41 | Torokonine                            | <i>A. japonicum</i> subsp. <i>subcuneatum</i> <sup>13</sup> , <i>A. subcuneatum</i> <sup>83</sup>                                                                                                                                                                                                                                                                                                                                                                                                                                                                                                                                                                                                                                                                                                                         |
| 42 | Cardiopetamine                        | <i>A. napellus</i> <sup>84</sup><br><i>D. cardiopetalum</i> <sup>85</sup> , <i>D. gracile</i> <sup>86</sup>                                                                                                                                                                                                                                                                                                                                                                                                                                                                                                                                                                                                                                                                                                               |
| 43 | 15-Acetylcardiopetamine               | <i>A. napellus</i> <sup>84</sup><br><i>D. cardiopetalum</i> <sup>85</sup>                                                                                                                                                                                                                                                                                                                                                                                                                                                                                                                                                                                                                                                                                                                                                 |
| 44 | 13-Deoxy-13-oxocardiopetamine acetate | <i>A. napellus</i> <sup>87</sup>                                                                                                                                                                                                                                                                                                                                                                                                                                                                                                                                                                                                                                                                                                                                                                                          |
| 45 | Tangutisine<br>(Guan-fu alcoholamine) | <i>A. coreanum</i> <sup>22</sup> , <i>A. tanguticum</i> <sup>88</sup> , <i>A. zeravschanicum</i> <sup>89</sup>                                                                                                                                                                                                                                                                                                                                                                                                                                                                                                                                                                                                                                                                                                            |

---

---

|           |                                                              |                                                                                                                                                                                                    |
|-----------|--------------------------------------------------------------|----------------------------------------------------------------------------------------------------------------------------------------------------------------------------------------------------|
| <b>46</b> | Guan-fu base Y (Acorine)                                     | <i>A. anthora</i> <sup>90</sup> , <i>A. coreanum</i> <sup>55</sup><br><i>D. ternatum</i> <sup>91</sup>                                                                                             |
| <b>47</b> | Guan-fu base Z                                               | <i>A. coreanum</i> <sup>55</sup> , <i>A. kusnezoffii</i> var. <i>gibbiferum</i> <sup>92</sup> ,<br><i>A. tanguticum</i> var. <i>trichocarpum</i> <sup>93</sup><br><i>D. ternatum</i> <sup>91</sup> |
| <b>48</b> | Acoridine                                                    | <i>A. coreanum</i> <sup>55, 94</sup>                                                                                                                                                               |
| <b>49</b> | Guan-fu base A                                               | <i>A. coreanum</i> <sup>55</sup>                                                                                                                                                                   |
| <b>50</b> | Guan-fu base O                                               | <i>A. coreanum</i> <sup>55</sup>                                                                                                                                                                   |
| <b>51</b> | Guan-fu base F                                               | <i>A. coreanum</i> <sup>55</sup>                                                                                                                                                                   |
| <b>52</b> | Zeravshanisine                                               | <i>A. zeravschanicum</i> <sup>89</sup>                                                                                                                                                             |
| <b>53</b> | Guan-fu base G                                               | <i>A. coreanum</i> <sup>55</sup>                                                                                                                                                                   |
| <b>54</b> | Hypognavinol                                                 | <i>A. sanyoense</i> <sup>95</sup>                                                                                                                                                                  |
| <b>55</b> | Hypognavine                                                  | <i>A. sanyoense</i> <sup>96</sup><br><i>D. ternatum</i> <sup>91</sup>                                                                                                                              |
| <b>56</b> | Paniculatine                                                 | <i>A. paniculatum</i> <sup>97, 98</sup>                                                                                                                                                            |
| <b>57</b> | 1- <i>O</i> -Acetylhypognavine                               | <i>A. sanyoense</i> var. <i>tonense</i> <sup>12</sup>                                                                                                                                              |
| <b>58</b> | 1,15-Di- <i>O</i> -acetylhypognavine                         | <i>A. sanyoense</i> var. <i>tonense</i> <sup>12</sup>                                                                                                                                              |
| <b>59</b> | Anthoroidine<br>(tadjaconine, tadzhaconine,<br>tadzhakonine) | <i>A. anthoroideum</i> <sup>99</sup> , <i>A. tokii</i> <sup>100</sup> , <i>A. zeravschanicum</i> <sup>101</sup>                                                                                    |
| <b>60</b> | 3- <i>epi</i> -ignavinol                                     | <i>A. japonicum</i> var. <i>montanum</i> <sup>102</sup>                                                                                                                                            |
| <b>61</b> | Ignavinol (Anhydroignavinol)                                 | <i>A. sanyoense</i> <sup>103</sup>                                                                                                                                                                 |
| <b>62</b> | Ignavine                                                     | <i>A. japonicum</i> <sup>104</sup> , <i>A. sanyoense</i> <sup>105</sup> , <i>A. tasiromontanum</i> <sup>106</sup>                                                                                  |
| <b>63</b> | Cossonine                                                    | <i>D. cossonianum</i> <sup>107</sup>                                                                                                                                                               |
| <b>64</b> | Coreanine A                                                  | <i>A. coreanum</i> <sup>55</sup>                                                                                                                                                                   |
| <b>65</b> | Coreanine B                                                  | <i>A. coreanum</i> <sup>55</sup>                                                                                                                                                                   |
| <b>66</b> | Coreanine C                                                  | <i>A. coreanum</i> <sup>55</sup>                                                                                                                                                                   |
| <b>67</b> | Coreanine D                                                  | <i>A. coreanum</i> <sup>55</sup>                                                                                                                                                                   |
| <b>68</b> | Tanguticine A                                                | <i>A. tanguticum</i> <sup>108</sup>                                                                                                                                                                |
| <b>69</b> | Tanguticine B                                                | <i>A. tanguticum</i> <sup>108</sup>                                                                                                                                                                |
| <b>70</b> | Tanguticine C                                                | <i>A. tanguticum</i> <sup>108</sup>                                                                                                                                                                |
| <b>71</b> | 13-Acetylhetisinone                                          | <i>D. cardiopetalum</i> <sup>109</sup> , <i>D. gracile</i> <sup>86</sup> , <i>D. peregrinum</i> <sup>110</sup>                                                                                     |
| <b>72</b> | Cardiopine                                                   | <i>D. cardiopetalum</i> <sup>111</sup>                                                                                                                                                             |
| <b>73</b> | Cardiopinine                                                 | <i>D. cardiopetalum</i> <sup>111</sup>                                                                                                                                                             |
| <b>74</b> | Cardiopimine                                                 | <i>D. cardiopetalum</i> <sup>111</sup>                                                                                                                                                             |
| <b>75</b> | Cardiopidine                                                 | <i>D. cardiopetalum</i> <sup>111</sup>                                                                                                                                                             |
| <b>76</b> | 11,13- <i>O</i> -diacetyl-9-deoxyglanduline                  | <i>C. glandulosa</i> <sup>112</sup>                                                                                                                                                                |
| <b>77</b> | 13- <i>O</i> -acetyl-9-deoxyglanduline                       | <i>C. glandulosa</i> <sup>112</sup>                                                                                                                                                                |
| <b>78</b> | 14- <i>O</i> -acetyl-9-deoxyglanduline                       | <i>C. glandulosa</i> <sup>112</sup>                                                                                                                                                                |
| <b>79</b> | Orientinine                                                  | <i>A. orientale</i> <sup>113</sup><br><i>Rumex pictus</i> <sup>114</sup>                                                                                                                           |
| <b>80</b> | Anthriscifolsine B                                           | <i>D. anthriscifolium</i> var. <i>majus</i> <sup>52</sup>                                                                                                                                          |
| <b>81</b> | 13- <i>O</i> -acetyl-glanduline                              | <i>C. glandulosa</i> <sup>112</sup>                                                                                                                                                                |
| <b>82</b> | Glanduline                                                   | <i>C. glandulosa</i> <sup>112</sup>                                                                                                                                                                |

---

---

|            |                                     |                                                                                                                                                                     |
|------------|-------------------------------------|---------------------------------------------------------------------------------------------------------------------------------------------------------------------|
| <b>83</b>  | 9-Deoxyglanduline                   | <i>C. glandulosa</i> <sup>115</sup>                                                                                                                                 |
| <b>84</b>  | Glandulosine                        | <i>C. glandulosa</i> <sup>115</sup>                                                                                                                                 |
| <b>85</b>  | 11,13- <i>O</i> -diacetylglanduline | <i>C. glandulosa</i> <sup>115</sup>                                                                                                                                 |
| <b>86</b>  | 9- <i>O</i> -acetylglanduline       | <i>C. glandulosa</i> <sup>115</sup>                                                                                                                                 |
| <b>87</b>  | Cardiodine                          | <i>D. cardiopetalum</i> <sup>111</sup>                                                                                                                              |
| <b>88</b>  | Delphigraciline                     | <i>D. gracile</i> <sup>116</sup>                                                                                                                                    |
| <b>89</b>  | Davisinol                           | <i>D. davisii</i> <sup>8</sup> , <i>D. virgatum</i> <sup>117</sup>                                                                                                  |
| <b>90</b>  | 18-Benzoyldavisinol                 | <i>D. davisii</i> <sup>8</sup>                                                                                                                                      |
| <b>91</b>  | Guan-fu base S                      | <i>A. coreanum</i> <sup>55, 118</sup>                                                                                                                               |
| <b>92</b>  | Guan-fu base N                      | <i>A. coreanum</i> <sup>22</sup>                                                                                                                                    |
| <b>93</b>  | Guan-fu base W                      | <i>A. coreanum</i> <sup>69</sup>                                                                                                                                    |
| <b>94</b>  | Zeraconine                          | <i>A. zeravschanicum</i> <sup>119</sup>                                                                                                                             |
| <b>95</b>  | Delatisine                          | <i>D. elatum</i> <sup>120</sup>                                                                                                                                     |
| <b>96</b>  | Orgetine                            | <i>A. recemulosum</i> <sup>14</sup>                                                                                                                                 |
| <b>97</b>  | Racemulosine A                      | <i>A. recemulosum</i> <sup>121</sup>                                                                                                                                |
| <b>98</b>  | Spiradine A                         | <i>S. japonica</i> <sup>122</sup> , <i>S. japonica</i> var. <i>fortunei</i> <sup>123, 124</sup><br><i>Thalictrum sessile</i> <sup>125</sup>                         |
| <b>99</b>  | Spiradine B                         | <i>S. japonica</i> <sup>126, 127</sup> , <i>S. japonica</i> var. <i>fortune</i> <sup>128</sup>                                                                      |
| <b>100</b> | Venulol                             | <i>A. tanguticum</i> var. <i>trichocarpum</i> <sup>129</sup><br><i>D. venulosum</i> <sup>68</sup>                                                                   |
| <b>101</b> | Spiradine C                         | <i>S. japonica</i> <sup>126, 127</sup>                                                                                                                              |
| <b>102</b> | Spirasine XIV                       | <i>S. japonica</i> <sup>130</sup>                                                                                                                                   |
| <b>103</b> | Spirasine XV                        | <i>S. japonica</i> <sup>130</sup>                                                                                                                                   |
| <b>104</b> | 6,15 $\delta$ -dihydroxylhetisine   | <i>A. heterophyllum</i> <sup>19</sup>                                                                                                                               |
| <b>105</b> | Pseudokobusine                      | <i>A. lucidusculum</i> <sup>131</sup> , <i>A. nasutum</i> <sup>132</sup> , <i>A. yesoense</i> var. <i>macroyesoense</i> <sup>133</sup>                              |
| <b>106</b> | Panicudine                          | <i>A. longzhoushanense</i> <sup>134</sup> , <i>A. paniculatum</i> <sup>135</sup><br><i>Rumex pictus</i> <sup>114</sup><br><i>Polygonum aviculare</i> <sup>136</sup> |
| <b>107</b> | Spirasine XII                       | <i>S. japonica</i> <sup>130</sup>                                                                                                                                   |
| <b>108</b> | Spirasine XIV                       | <i>S. japonica</i> <sup>130</sup>                                                                                                                                   |
| <b>109</b> | Paniculadine                        | <i>A. paniculatum</i> <sup>137</sup>                                                                                                                                |
| <b>110</b> | Delnuttidine                        | <i>D. nuttallianum</i> <sup>78</sup>                                                                                                                                |
| <b>111</b> | Yesodine                            | <i>A. yesoense</i> var. <i>macroyesoense</i> <sup>138</sup>                                                                                                         |
| <b>112</b> | 15-Benzoylpseudokobusine            | <i>A. yesoense</i> var. <i>macroyesoense</i> <sup>139</sup>                                                                                                         |
| <b>113</b> | 15-Veratroypseudokobusine           | <i>A. yesoense</i> var. <i>macroyesoense</i> <sup>139</sup>                                                                                                         |
| <b>114</b> | Tatsirine                           | <i>D. tatsienense</i> <sup>140</sup>                                                                                                                                |
| <b>115</b> | Acorientine                         | <i>A. orientale</i> <sup>113</sup> , <i>Rumex pictus</i> <sup>114</sup>                                                                                             |
| <b>116</b> | Tatsienenseine B                    | <i>D. tatsienense</i> <sup>18</sup>                                                                                                                                 |
| <b>117</b> | Majusidine A                        | <i>D. majus</i> <sup>80</sup>                                                                                                                                       |
| <b>118</b> | Delbidine                           | <i>D. barbeyi</i> <sup>141</sup> , <i>D. occidentale</i> <sup>141</sup>                                                                                             |
| <b>119</b> | Geyeridine                          | <i>D. geyeri</i> <sup>142</sup>                                                                                                                                     |
| <b>120</b> | Geyerine                            | <i>D. geyeri</i> <sup>142</sup>                                                                                                                                     |

---

---

|            |                                                                     |                                                                                                                            |
|------------|---------------------------------------------------------------------|----------------------------------------------------------------------------------------------------------------------------|
| <b>121</b> | Delnuttaline                                                        | <i>D. nuttallianum</i> <sup>78</sup>                                                                                       |
| <b>122</b> | Cardionine                                                          | <i>D. cardiopetalum</i> <sup>143</sup>                                                                                     |
| <b>123</b> | 11-Acetylcardionine                                                 | <i>D. gracile</i> <sup>143</sup>                                                                                           |
| <b>124</b> | Nagaconitine D                                                      | <i>A. nagarum</i> var. <i>heterotrichum</i> <sup>144</sup>                                                                 |
| <b>125</b> | Tanguticuline E                                                     | <i>A. tanguticum</i> <sup>108</sup>                                                                                        |
| <b>126</b> | Guan-fu base Q                                                      | <i>A. coreanum</i> <sup>55</sup>                                                                                           |
| <b>127</b> | Guan-fu base T                                                      | <i>A. coreanum</i> <sup>145</sup>                                                                                          |
| <b>128</b> | Guan-fu base U                                                      | <i>A. coreanum</i> <sup>145</sup>                                                                                          |
| <b>129</b> | Anthriscifolsine C                                                  | <i>D. anthriscifolium</i> var. <i>majus</i> <sup>52</sup>                                                                  |
| <b>130</b> | Geyerinine                                                          | <i>A. tanguticum</i> var. <i>trichocarpum</i> <sup>129</sup><br><i>D. geyeri</i> <sup>142</sup>                            |
| <b>131</b> | Acsinatine                                                          | <i>A. leucostomum</i> <sup>146</sup>                                                                                       |
| <b>132</b> | Andersobine                                                         | <i>D. andersonii</i> <sup>147</sup>                                                                                        |
| <b>133</b> | Talatisine                                                          | <i>A. talassicum</i> <sup>148</sup> , <i>A. orientale</i> <sup>149</sup>                                                   |
| <b>134</b> | Vakhmatine                                                          | <i>C. ambigua</i> <sup>150</sup>                                                                                           |
| <b>135</b> | 13-O-acetylvakhmatine                                               | <i>C. ambigua</i> <sup>150</sup>                                                                                           |
| <b>136</b> | Septenine                                                           | <i>A. septentrionale</i> <sup>151</sup>                                                                                    |
| <b>137</b> | Septentriosine                                                      | <i>C. anthoroidea</i> <sup>28</sup> , <i>D. ternatum</i> <sup>152</sup> , <i>A. septentrionale</i> <sup>153</sup>          |
| <b>138</b> | 2-Acetyseptentriosine                                               | <i>A. septentrionale</i> <sup>154</sup>                                                                                    |
| <b>139</b> | Delgramine                                                          | <i>D. grandiflorum</i> <sup>152, 155</sup>                                                                                 |
| <b>140</b> | Ternatine                                                           | <i>D. ternatum</i> <sup>91</sup>                                                                                           |
| <b>141</b> | Tanguticuline D                                                     | <i>A. tanguticum</i> <sup>108</sup>                                                                                        |
| <b>142</b> | Laxipilostine                                                       | <i>D. laxicymosum</i> var. <i>pilostachyum</i> <sup>156</sup>                                                              |
| <b>143</b> | Laxipilosdine                                                       | <i>D. laxicymosum</i> var. <i>pilostachyum</i> <sup>156</sup>                                                              |
| <b>144</b> | Laxipilosline                                                       | <i>D. laxicymosum</i> var. <i>pilostachyum</i> <sup>156</sup>                                                              |
| <b>145</b> | Anthriscifolmine J                                                  | <i>D. anthriscifolium</i> var. <i>savatieri</i> <sup>157</sup>                                                             |
| <b>146</b> | Flexiosine                                                          | <i>D. flexuosum</i> <sup>158</sup>                                                                                         |
| <b>147</b> | Yunnanenseine B                                                     | <i>D. yunnanense</i> <sup>159</sup>                                                                                        |
| <b>148</b> | Yunnanenseine C                                                     | <i>D. yunnanense</i> <sup>159</sup>                                                                                        |
| <b>149</b> | Anthriscifolmine C                                                  | <i>D. anthriscifolium</i> var. <i>majus</i> <sup>52</sup> , <i>D. anthriscifolium</i> var. <i>savatieri</i> <sup>155</sup> |
| <b>150</b> | 14-Hydroxyhetisinone N-oxide                                        | <i>D. gracile</i> <sup>116</sup>                                                                                           |
| <b>151</b> | Guan fu base Z N-oxide<br>(14-Hydroxy-2-isobutyrylhetisine N-oxide) | <i>A. coreanum</i> <sup>160, 161</sup>                                                                                     |
| <b>152</b> | Guan fu base F N-oxide                                              | <i>A. coreanum</i> <sup>160, 162</sup>                                                                                     |
| <b>153</b> | Zeraconine N-oxide                                                  | <i>A. zeravschanicum</i> <sup>119</sup>                                                                                    |
| <b>154</b> | Guan-fu base X                                                      | <i>A. coreanum</i> <sup>69, 22</sup>                                                                                       |
| <b>155</b> | Vilmorrianine F                                                     | <i>A. vilmorrianum</i> <sup>10</sup>                                                                                       |
| <b>156</b> | Vilmorrianine G                                                     | <i>A. vilmorrianum</i> <sup>10</sup>                                                                                       |
| <b>157</b> | 2-O-acetyl-7R-hydroxyorochrine                                      | <i>A. orochryseum</i> <sup>163</sup>                                                                                       |

---

## Reference

1. F. Sun and D. Q. Yu, *Acta Pharm. Sin.*, 1985, **20**, 913-917.

2. R. M. Tian, Y. M. Cheng, B. R. Chen, P. Liu, S. H. Jiang, B. N. Zhou, P. J. Zheng and M. Wang, *Acta Chim. Sin.*, 1987, **45**, 776-779.
3. S. Sakai, I. Yamamoto, K. Hotoda, K. Yamaguchi, N. Aimi, E. Yamanaka and T. Okamoto, *Yakugaku Zasshi*, 1984, **104**, 222-237.
4. S. Sakai, I. Yamamoto, K. Yamaguchi, H. Takayama, M. Ito and T. Okamoto, *Chem. Pharm. Bull.*, 1982, **30**, 4579-4582.
5. Z. M. Vaisov, B. T. Salimov, B. Tashkhodzhaev and M. S. Yunusov, *Chem. Nat. Comp.*, 1986, **22**, 623-623.
6. L. He, Y. Z. Chen, L. S. Ding and B. G. Li, *Chin. Trad. Herbal Drugs*, 1997, **28**, 392-395.
7. M. Reina, J. A. Gavín, A. Madinaveitia, R. D. Acosta and G. de la Fuente, *J. Nat. Prod.*, 1996, **59**, 145-147.
8. A. Ulubelen, H. K. Desai, S. K. Srivastava, B. P. Hart, J. C. Park, B. S. Joshi and R. Ilarslan, *J. Nat. Prod.*, 1996, **59**, 360-366.
9. F. Sun, X. T. Liang and D. Q. Yu, *J. Nat. Prod.*, 1987, **50**, 923-926.
10. T. X. Tang, Q. F. Chen, X. Y. Liu, X. X. Jian and F. P. Wang, *J. Asian Nat. Prod. Res.*, 2016, **18**, 315-327.
11. S. Sakai, K. Yamaguchi, H. Takayama, I. Yamamoto and T. Okamoto, *Chem. Pharm. Bull.*, 1982, **30**, 4576-4578.
12. H. Takayama, Y. Hitotsuyanagi, K. Yamaguchi, N. Aimi and S. Sakai, *Chem. Pharm. Bull.*, 1992, **40**, 2927-2931.
13. H. Yamashita, M. Miyao, K. Hiramori, D. Kobayashi, Y. Suzuki, M. Mizukami, M. Goto, K. H. Lee and K. Wada, *J. Nat. Med.*, 2020, **74**, 83-89.
14. L. V. Beshitaishvili and M. N. Sultankhodzhaev, *Chem. Nat. Compd.*, 1992, **28**, 206-208.
15. H. Suginome, S. Kakimoto and J. Sonoda, *J. Faculty Sci., Hokkaido Univ., Ser. III Chem*, 1950, 25-32.
16. H. Suginome and H. Simamouti, *Justus Liebigs Annalen der Chemie*, 1940, **545**, 220-228.
17. K. Wada and N. Kawahara, *Helv. Chim. Acta*, 2009, **92**, 629-637.
18. F. Z. Chen, Q. H. Chen, X. Y. Liu and F. P. Wang, *Helv. Chim. Acta*, 2011, **94**, 853-858.
19. H. Ahmad, S. Ahmad, S. A. A. Shah, A. Latif, M. Ali, F. A. Khan, M. N. Tahir, F. Shaheen, A. Wadood and M. Ahmad, *Bioorg. Med. Chem.*, 2017, **25**, 3368-3376.
20. M. Grandez, A. Madinaveitia, J. A. Gavín, A. Alva and G. de la Fuente, *J. Nat. Prod.*, 2002, **65**, 513-516.
21. A. H. Mericli, F. Mericli, A. Ulubelen, M. Bahar, R. Ilarslan, G. Algul, H. K. Desai, Q. Teng and S. W. Pelletier, *Pharmazie*, 2000, **55**, 696-698.
22. B. N. Xing, S. S. Jin, H. Wang, Q. F. Tang, J. H. Liu, R. Y. Li, J. Y. Liang, Y. Q. Tang and C. H. Yang, *Fitoterapia*, 2014, **94**, 120-126.
23. S. W. Pelletier, R. Aneja and K. W. Gopinath, *Phytochemistry*, 1968, **7**, 625-635.
24. Z. B. Li, G. H. Lu, D. L. Chen and F. P. Wang, *Nat. Prod. Res. Dev.*, 1997, **9**, 9-14.
25. Q. P. Jiang and S. W. Pelletier, *J. Nat. Prod.*, 1991, **54**, 525-531.
26. J. F. Zhang, Y. Li, F. Gao, L. H. Shan and X. L. Zhou, *J. Asian Nat. Prod. Res.*, 2019, **21**, 716-724.
27. B. T. Salimov, Z. K. Kuzibaeva and F. N. Dzhakhangirov, *Khimiya Prirodnykh Soedinenii*, 1996, 384-387.
28. S. Suzgec, L. Bitis, U. Sozer, H. Ozcelik, J. Zapp, A. K. Kiemer and A. H. Mericli, *Chem. Nat. Comp.*, 2009, **45**, 287-289.

29. G. De La Fuente, L. Ruiz-Mesía, J. Molero and C. Blanché, *Fitoterapia*, 1996, **67**, 87-88.
30. L. Bitiş, S. Süzgeç, F. Meriçli, H. Özçelik, J. Zapp, H. Becker and A. H. Meriçli, *Pharm. Biol.*, 2008, **44**, 244-246.
31. F. Mericli, A. H. Mericli, N. Tan, H. Oezcelik and A. Ulubelen, *Sci. Pharm.*, 1999, **67**, 313-318.
32. G. De la Fuente and L. Ruiz-Mesía, *Phytochemistry*, 1995, **39**, 1459-1465.
33. C. Y. Zhang, W. L. Sung and D. H. Chen, *Fitoterapia*, 1993, **64**, 188-189.
34. A. H. Mericli, F. Mericli, H. K. Desai, R. Ilarslan, A. Ulubelen and S. W. Pelletier, *Pharmazie*, 2001, **56**, 418-419.
35. L. He, Y. Z. Chen, L. S. Ding and B. G. Li, *Chin. Trad. Herbal Drugs*, 1997, **28**, 392-395.
36. M. Benn, J. F. Richardson and W. Majak, *Heterocycles*, 1986, **24**, 1605-1607.
37. M. H. Benn, *Can. J. Chem.*, 1966, **44**, 1-8.
38. J. A. Goodson, *J. Chem. Soc.*, 1943, 139-141.
39. A. Ulubelen, A. H. Mericli, F. Mericli, U. Kolak, R. Ilarslan, W. Voelter and From, *Phytochemistry*, 1998, **50**, 513-516.
40. S. W. Pelletier, J. A. Glinski, B. S. Joshi and S. Y. Chen, *Heterocycles*, 1983, **20**, 1347-1354.
41. P. Kulanthaivel and M. Benn, *Heterocycles*, 1985, **23**, 2515-2520.
42. S. W. Pelletier, F. M. Harraz, M. M. Badawi, S. Tantiraksachai, F. P. Wang and S. Y. Chen, *Heterocycles* 1986, **24**, 1853-1865.
43. A. Ulubelen, A. H. Mericli and F. Mericli, *J. Nat. Prod.*, 1993, **56**, 780-781.
44. C. Z. Lin, Z. X. Zhao, S. M. Xie, J. H. Mao, C. C. Zhu, X. H. Li, B. Zeren-dawa, K. Suolang-qimei, D. Zhu, T. Q. Xiong and A. Z. Wu, *Phytochemistry*, 2014, **97**, 88-95.
45. F. Mericli, H. Soydan and A. H. Mericli, *Acta Pharm. Sci.*, 2009, **51**, 219-223.
46. W. A. Jacobs and L. C. Craig, *J. Biol. Chem.*, 1942, **143**, 605-609.
47. P. Kulanthaivel, S. W. Pelletier and J. D. Olsen, *Heterocycles*, 1988, **27**, 339-342.
48. A. Ulubelen, A. H. Mericli, F. Mericli, R. Ilarslan and W. Voelter, *Phytochemistry*, 1993, **34**, 1165-1167.
49. L. Bitiş, S. Suzgeç, U. Sozer, H. Ozcelik, J. Zapp, A. K. Kiemer, F. Mericli and A. H. Mericli, *Helv. Chim. Acta*, 2007, **90**, 2217-2221.
50. Q. P. Jiang and S. W. Pelletier, *Tetrahedron Lett.*, 1988, **29**, 1875-1878.
51. S. Z. Huang, J. X. Cao, S. P. Jiang and H. J. Zhu, *Nat. Prod. Res. Dev.*, 2011, **23**, 655-657.
52. L. H. Shan, J. F. Zhang, F. Gao, S. Huang and X. L. Zhou, *Sci. Rep.*, 2017, **7**, 6063.
53. M. H. Benn, I. Francis, Okanga and R. M. Manavu, *Phytochemistry*, 1989, **28**, 919-922.
54. M. Benn, J. F. Richardson and W. Majak, *Heterocycles*, 1986, **24**, 1605-1607.
55. J. B. Xu, Y. Y. Luo, S. Huang, F. Gao and X. L. Zhou, *Chem. Biodivers.*, 2019, **17**, e1900600.
56. P. Forgo, B. Borcsa, D. Csupor, L. Fodor, R. Berkecz, V. A. Molnar and J. Hohmann, *Planta Med.*, 2011, **77**, 368-373.
57. Q. Tang, C. Yang, W. Ye, J. Liu and S. Zhao, *Phytochem. Anal.*, 2008, **19**, 155-159.
58. Y. Han, J. H. Liu and M. S. Wang, *Chin. Trad. Herb. Drugs*, 1994, **25**, 619-621.
59. B. Borcsa, L. Fodor, D. Csupor, P. Forgo, A. Molnár and J. Hohmann, *Planta Med.*, 2014, **80**, 231-236.
60. H. Q. Wang, S. H. Jiang, P. M. Yang, M. H. Ying, S. J. Lin and D. Y. Zhu, *Nat. Prod. Res. Dev.*, 2002, **14**, 13-15.
61. F. Mericli, A. H. Mericli, H. K. Desai, A. Ulubelen and S. W. Pelletier, *Sci. Pharm.*, 2001, **69**, 63-67.
62. M. H. Benn, *Can. J. Chem.*, 1966, **44**, 1-8.

63. A. Ulubelen, H. K. Desai, S. K. Srivastava, B. P. Hart, J. C. Park, B. S. Joshi and R. Ilarslan, *J. Nat. Prod.*, 1996, **59**, 360-366.
64. A. Ulubelen, A. H. Mericli, F. Mericli, R. Ilarslan and W. Voelter, *Phytochemistry*, 1993, **34**, 1165-1167.
65. A. G. Gonzalez, G. De la Fuente, M. Reina and I. Timon, *Heterocycles*, 1984, **22**, 667-669.
66. S. M. Xie, C. Z. Lin, C. C. Zhu, Z. D. Bairi and S. Kangsa, *Chin. J. New Drugs Clin. Remedies*, 2011 **22**, 546-548.
67. A. Ulubelen, A. H. Mericli and F. Mericli, *J. Nat. Prod.*, 1993, **56**, 780-781.
68. A. Ulubelen, A. H. Mericli, F. Mericli, R. Ilarslan and S. A. Matlin, *Phytochemistry*, 1992, **31**, 3239-3241.
69. Q. F. Tang, W. C. Ye, J. H. Liu and C. H. Yang, *Phytochem. Lett.*, 2012, **5**, 397-400.
70. T. Okamoto, H. Sanjoh, K. Yamaguchi, Y. \litaka and S. Saka, *Chem. Pharm. Bull.*, 1983, **31**, 1431-1432.
71. F. P. Wang and X. T. Liang, *Planta Med.*, 1985, **51**, 443-444.
72. E. Ochiai, T. Okamoto, S. Sakai, M. Kaneko, K. Fujisawa, U. Nagai and H. Tani, *Yakugaku Zasshi*, 1956, **76**, 550-553.
73. L. He, Y. J. Pan, X. Pan, B. G. Li and Y. Z. Chen, *Chin. Chem. Lett.*, 1999, **10**, 395-396.
74. S. Sakai, K. Yamaguchi, I. Yamamoto, K. Hotoda, T. Okazaki, N. Aimi and T. Okamoto, *Chem. Pharm. Bull.*, 1983, **31**, 3338-3341.
75. H. Yamashita, K. Takeda, M. Haraguchi, Y. Abe, N. Kuwahara, S. Suzuki, A. Terui, T. Masaka, N. Munakata, M. Uchida, M. Nunokawa, K. Kaneda, M. Goto, K. H. Lee and K. Wada, *J. Nat. Med.*, 2018, **72**, 230-237.
76. L. Gao, X. Wei and L. Yang, *J. Chem. Res.*, 2004, **2004**, 307-308.
77. Y. Q. He, Z. Y. Ma, Q. Yang, B. H. Yao and L. M. Gao, *Acta Pharm. Sin.*, 2008, **43**, 934-937.
78. Y. Bai, F. Sun, M. Benn and W. Majak, *Phytochemistry*, 1994, **37**, 1717-1724.
79. J. Li, D. L. Chen, X. X. Jian and F. P. Wang, *Molecules*, 2007, **12**, 353-360.
80. F. Z. Chen, D. L. Chen, Q. H. Chen and F. P. Wang, *J. Nat. Prod.*, 2009, **72**, 18-23.
81. Y. Li and S. Liang, *China J. Chin. Mater. Med.*, 2009, **34**, 220-222.
82. Z. J. Zhan, L. F. Ma, X. Y. Zhang and W. G. Shan, *J. Chem. Res.*, 2009, **2009**, 20-21.
83. S. I. Sakai, T. Okazaki, K. Yamaguchi, H. Takayama and N. Aimi, *Chem. Pharm. Bull.*, 1987, **35**, 2615-2617.
84. G. De la Fuente, M. Reina and E. Valencia, *Heterocycles*, 1989, **29**, 1577-1582.
85. A. G. Gonzalez, G. De la Fuente, M. Reina, P. G. Jones and P. R. Raithby, *Tetrahedron Lett.*, 1983, **24**, 3765-3768.
86. A. G. Gonzalez, G. De la Fuente, M. Reina and I. Timon, *Heterocycles*, 1984, **22**, 667-669.
87. G. De la Fuente, M. Reina and E. Valencia, *Heterocycles*, 1989 **29**, 1577-1582.
88. B. S. Joshi, D. H. Chen, X. Zhang, J. K. Snyder and S. W. Pelletier, *Heterocycles* 1991, **32**, 1793-1804.
89. B. T. Salimov, B. Tashkhodaev, I. M. Yusupova, S. V. Lindeman and Y. T. Struchkov, *Chem. Nat. Comp.*, 1992, **28**, 329-334.
90. A. H. Meriçli, F. Meriçli, A. Ulubelen, M. Bahar, R. Ilarslan, G. Algül and S. W. Pelletier, *Die Pharmazie*, 2000, **55**, 696-698.
91. A. S. Narzullaev, N. D. Abdullaev, M. S. Yunusov, V. M. Matveev and S. G. Yunusova, *Russ. Chem. Bull.*, 1997, **46**, 184-185.

92. Y. Z. Li, L. L. Qin, F. Gao, L. H. Shan and X. L. Zhou, *Fitoterapia*, 2020, **144**, 104609.
93. Z. T. Zhang, D. L. Chen, Q. H. Chen and F. P. Wang, *Helv. Chim. Acta*, 2013, **96**, 710-718.
94. I. A. Bessonova, L. N. Samusenko, M. S. Yunosov, M. R. Yagidaev and V. G. Kondrat'ev, *Chem. Nat. Compd.*, 1991, **27**, 79-81.
95. S. W. Pelletier, S. W. Page and M. G. Newton, *Tetrahedron Lett.*, 1971, **12**, 795-797.
96. S. Sakai, K. Yamaguchi, I. Yamamoto and T. Okamoto, *Chem. Pharm. Bull.*, 1982, **30**, 4573-4575.
97. A. Katz, *J. Nat. Prod.*, 1989, **52**, 430-432.
98. G. E. Brunner, *Schweizerische Apotheker-Zeitung*, 1922, **60**, 357-358.
99. V. A. Tel'nov, M. S. Yunusov and S. Y. Yunusov, *Chem. Nat. Comp.*, 1971, **7**, 366-366.
100. Z. M. Vaisov, I. A. Bessonova and V. A. Tel'nov, *Chem. Nat. Comp.*, 1993, **29**, 71-72.
101. I. M. Yusupova, B. T. Salimov and B. Tashkhodzhaev, *Chem. Nat. Comp.*, 1992, **28**, 335-339.
102. H. Takayama, T. Okazaki, K. Yamaguchi, N. Aimi, J. Haginiwa and S. I. Sakai, *Chem. Pharm. Bull.*, 1988, **36**, 3210-3212.
103. S. W. Pelletier, S. W. Page and M. G. Newton, *Tetrahedron Lett.*, 1970, **11**, 4825-4827.
104. T. Okamoto, H. Sanjoh, K. Yamaguchi, A. Yoshino, T. Kaneko, Y. Iitaka and S. Sakai, *Chem. Pharm. Bull.*, 1982, **30**, 4600-4601.
105. E. Ochiai, T. Okamoto, T. Sugawara, H. Tani and H. S. Hai, *Yakugaku Zasshi*, 1952, **72**.
106. E. Ochiai, T. Okamoto, T. Sugawara and H. Tani, *Yakugaku Zasshi*, 1952 **72**.
107. G. de la Fuente, J. A. Gavin, R. D. Acosta and F. Sanchez-Ferrando, *Phytochemistry*, 1993, **34**, 553-558.
108. X. Fan, L. Yang, Z. Liu, L. Lin, C. Li, S. Guo, Z. Wang, Z. Wang and F. Sui, *Phytochemistry*, 2019, **160**, 71-77.
109. A. G. d. I. F. Gonzalez, G.; Reina, M., *Anales de Quimica, Serie C: Quimica Organica y Bioquimica*, 1981, **77**, 171-173.
110. G. De la Fuente, J. A. Gavin, R. Diaz Acosta and J. A. Morales, *Heterocycles*, 1988, **27**, 1-5.
111. M. Reina, A. Madinaveitia, J. Gavín and G. de la Fuente, *Phytochemistry*, 1996, **41**, 1235-1250.
112. G. Almanza, J. Bastida, C. Codina and G. De La Fuente, *Phytochemistry*, 1997, **44**, 739-747.
113. A. Ulubelen, A. H. Meriçli, F. Meriçli and F. Yilmaz, *Phytochemistry*, 1996, **41**, 957-961.
114. H. M. H. Salama, *Egypt. J. Bot.*, 1997, **37**, 85-92.
115. L. Ruiz-Mesía, A. Madinaveitia, M. Reina, M. L. Rodriguez, G. de la Fuente and W. Ruiz-Mesía, *J. Nat. Prod.*, 2002, **65**, 496-499.
116. M. Reina, R. Mancha, A. Gonzalez-Coloma, M. Bailen, M. L. Rodriguez and R. A. Martinez-Diaz, *Nat. Prod. Res.*, 2007, **21**, 1048-1055.
117. A. H. Mericli, F. Mericli, H. K. Desai, R. Ilarslan, A. Ulubelen and S. W. Pelletier, *Die Pharmazie*, 2001, **56**, 418-419.
118. C. H. Yang, X. C. Wang, Q. F. Tang, W. Y. Liu and J. H. Liu, *Helv. Chim. Acta*, 2008, **91**, 759-765.
119. Z. M. Vaisov and M. S. Yunusov, *Chem. Nat. Compd.*, 1987, **23**, 337-339.
120. S. A. Ross, B. S. Joshi, H. K. Desai, S. W. Pelletier, M. G. Newton, X. Zhang and J. K. Snyder, *Tetrahedron*, 1991, **47**, 9585-9598.
121. Y. H. Ge, S. Z. Mu, S. Y. Yang, Y. Lu, J. X. Zhang, Y. Wang and X. J. Hao, *Helv. Chim. Acta*, 2009, **92**, 1860-1865.
122. Y. C. Wu, T. S. Wu, M. Niwa, S. T. Lu and Y. Hirata, *Heterocycles*, 1987, **26**, 943-946.
123. L. M. Fan, H. P. He, Y. M. Shen and X. J. Hao, *J. Integ. Plant Biol.*, 2005, **47**, 120-123.
124. G. Goto, K. Sasaki, N. Sakabe and Y. Hirata, *Tetrahedron Lett.*, 1968, 1369-1373.

125. Y. C. Wu, T. S. Wu, M. Niwa, S. T. Lu and Y. Hirata, *Phytochemistry*, 1988, **27**, 3949-3953.
126. B. G. Wang, X. Hong, G. Y. Zuo and X. J. Hao, *J. Asian Nat. Prod. Res.*, 2000, **2**, 271-281.
127. G. Goto, K. Sasaki, N. Sakabe and Y. Hirata, *Tetrahedron Lett.*, 1968, **9**, 1369-1373.
128. L. M. Fan, H. P. He, Y. M. Shen and X. J. Hao, *J. Integ. Plant Biol.*, 2005, **47**, 120-123.
129. L. Lin, D. L. Chen, X. Y. Liu, Q. H. Chen, F. P. Wang and C. Y. Yang, *Nat. Prod. Commun.*, 2009, **4**, 897-901.
130. F. Sun, X. T. Liang and D. Q. Yu, *J. Nat. Prod.*, 1988, **51**, 50-53.
131. H. Suginome, S. Kakimoto and J. Sonoda, *J. Faculty Sci., Hokkaido Univ., Ser. III Chem.*, 1950, **4**, 25-32.
132. A. H. Mericli, F. Mericli, H. K. Desai, B. S. Joshi, Q. Teng, K. Bhattacharyya and S. W. Pelletier, *Heterocycles* 2000, **53**, 1987-1996.
133. K. Wada and N. Kawahara, *Helv. Chim. Acta*, 2009, **92**, 629-637.
134. P. He, X. X. Jian, D. L. Chen and F. P. Wang, *Nat. Prod. Commun.*, 2009, **4**, 19-22.
135. I. A. Bessonova, S. A. Saidkhodzhaeva and M. F. Faskhutdinov, *Chem. Nat. Comp.*, 1995, **31**, 705-707.
136. H. M. Salama and N. Marraiki, *Saudi J. Biol. Sci.*, 2010, **17**, 57-63.
137. I. A. Bessonova and S. A. Saidkhodzhaeva, *Chem. Nat. Comp.*, 1996, **32**, 561-563.
138. K. Wada, H. Bando and N. Kawahara, *Heterocycles*, 1990, **31**, 1081-1088.
139. H. Bando, K. Wada, T. Amiya, K. Kobayashi, Y. Fujimoto and T. Sakurai, *Heterocycles*, 1987, **26**, 2623-2637.
140. X. L. Zhang and J. K. Snyder, *Heterocycles*, 1990, **31**, 1879-1888.
141. B. S. Joshi, H. K. Desai, E. S. A. El-kashoury, S. W. Pelletier and J. D. Olsent, *Phytochemistry*, 1989, **28**, 1561-1563.
142. J. A. Grina, D. R. Schroeder, E. T. Wydallis and F. R. Stermitz, *J. Org. Chem.*, 1986, **51**, 390-394.
143. G. De la Fuente, J. A. Gavin, M. Reina and R. D. Acosta, *J. Org. Chem.*, 1990, **55**, 342-344.
144. D. K. Zhao, X. Q. Shi, L. M. Zhang, D. Q. Yang, H. C. Guo, Y. P. Chen and Y. Shen, *Chin. Chem. Lett.*, 2017, **28**, 358-361.
145. Q. Tang, J. Liu, J. Xue, W. Ye, Z. Zhang and C. Yang, *J. Chromatogr. B*, 2008, **872**, 181-185.
146. V. A. Tel'nov, S. K. Usmanova and N. D. Abdullaev, *Chem. Nat. Comp.*, 1993, **29**, 346-348.
147. B. S. Joshi, M. S. Puar, Y. Bai, A. M. Panu and S. W. Pelletier, *Tetrahedron* 1994, **50**, 12283-12292.
148. S. Y. Yunusov, E. V. Sichkova and G. F. Potemkin, *Zhurnal Obshchei Khimii*, 1954, **24**, 2237-2242.
149. E. G. Mil'grom, V. N. Plugar, U. A. Abdullaev, N. Kirimer, K. K. S. Basher and B. T. Salimov, *Chem. Nat. Comp.*, 1994, **30**, 774-775.
150. V. Venkateswarlu, S. K. Srivastava, B. S. Joshi, H. K. Desai and S. W. Pelletier, *J. Nat. Prod.*, 1995, **58**, 1527-1532.
151. S. K. Usmanova, V. A. Tel'nov and N. D. Abdullaev, *Chem. Nat. Comp.*, 1993, **29**, 349-351.
152. C. J. Li and D. H. Chen, *Acta Chem. Sin.*, 1993, **51**, 915-918.
153. B. S. Joshi, H. K. Desai, S. W. Pelletier, E. M. Holt and A. J. Aasen, *J. Nat. Prod.*, 1988, **51**, 265-271.
154. S. A. Ross, B. S. Joshi, S. W. Pelletier, M. G. Newton and A. J. Aasen, *J. Nat. Prod.*, 1993, **56**, 424-429.
155. X. Y. Liu, Q. H. Chen and F. P. Wang, *Chin. Chem. Lett.*, 2009, **20**, 698-701.
156. D. L. Chen, P. Tang, Q. H. Chen and F. P. Wang, *Nat. Prod. Commun.*, 2014, **9**, 623-625.
157. X. Y. Liu, L. Song, Q. H. Chen and F. P. Wang, *Nat. Prod. Commun.*, 2010, **5**, 1005-1008.
158. T. M. Gabbasov, E. M. Tsyrlina, D. M. Anatov, L. V. Spirikhin and M. S. Yunusov, *Chem. Nat.*

- Compd.*, 2017, **53**, 105-108.
159. F. Z. Chen, Q. H. Chen and F. P. Wang, *Helv. Chim. Acta*, 2011, **94**, 254-260.
160. F. N. Dzhakhangirov and I. A. Bessonova, *Chem. Nat. Compd.*, 2002, **38**, 74-77.
161. I. A. Bessonova, L. N. Samusenko, M. S. Yunusov and V. G. Kondrat'ev, *Chem. Nat. Compd.*, 1990, **26**, 318-320.
162. I. M. Yusipova, B. Tashkhodzhaev, I. A. Bessonova, M. S. Yunusov, M. R. Yagudaev, V. G. Kondrat'ev and A. I. Shreter, *Chem. Nat. Compd.*, 1990, **26**, 314-318.
163. P. Wangchuk, J. B. Bremner and S. Samosorn, *J. Nat. Prod.*, 2007, **70**, 1808-1811.
